# Supplementary material for: Phylodynamic analysis of the canine distemper virus hemagglutinin gene
Source: PubMed Central journal article supplement (PMC4513961; doi:10.1186/s12917-015-0491-9), 2015-07-25

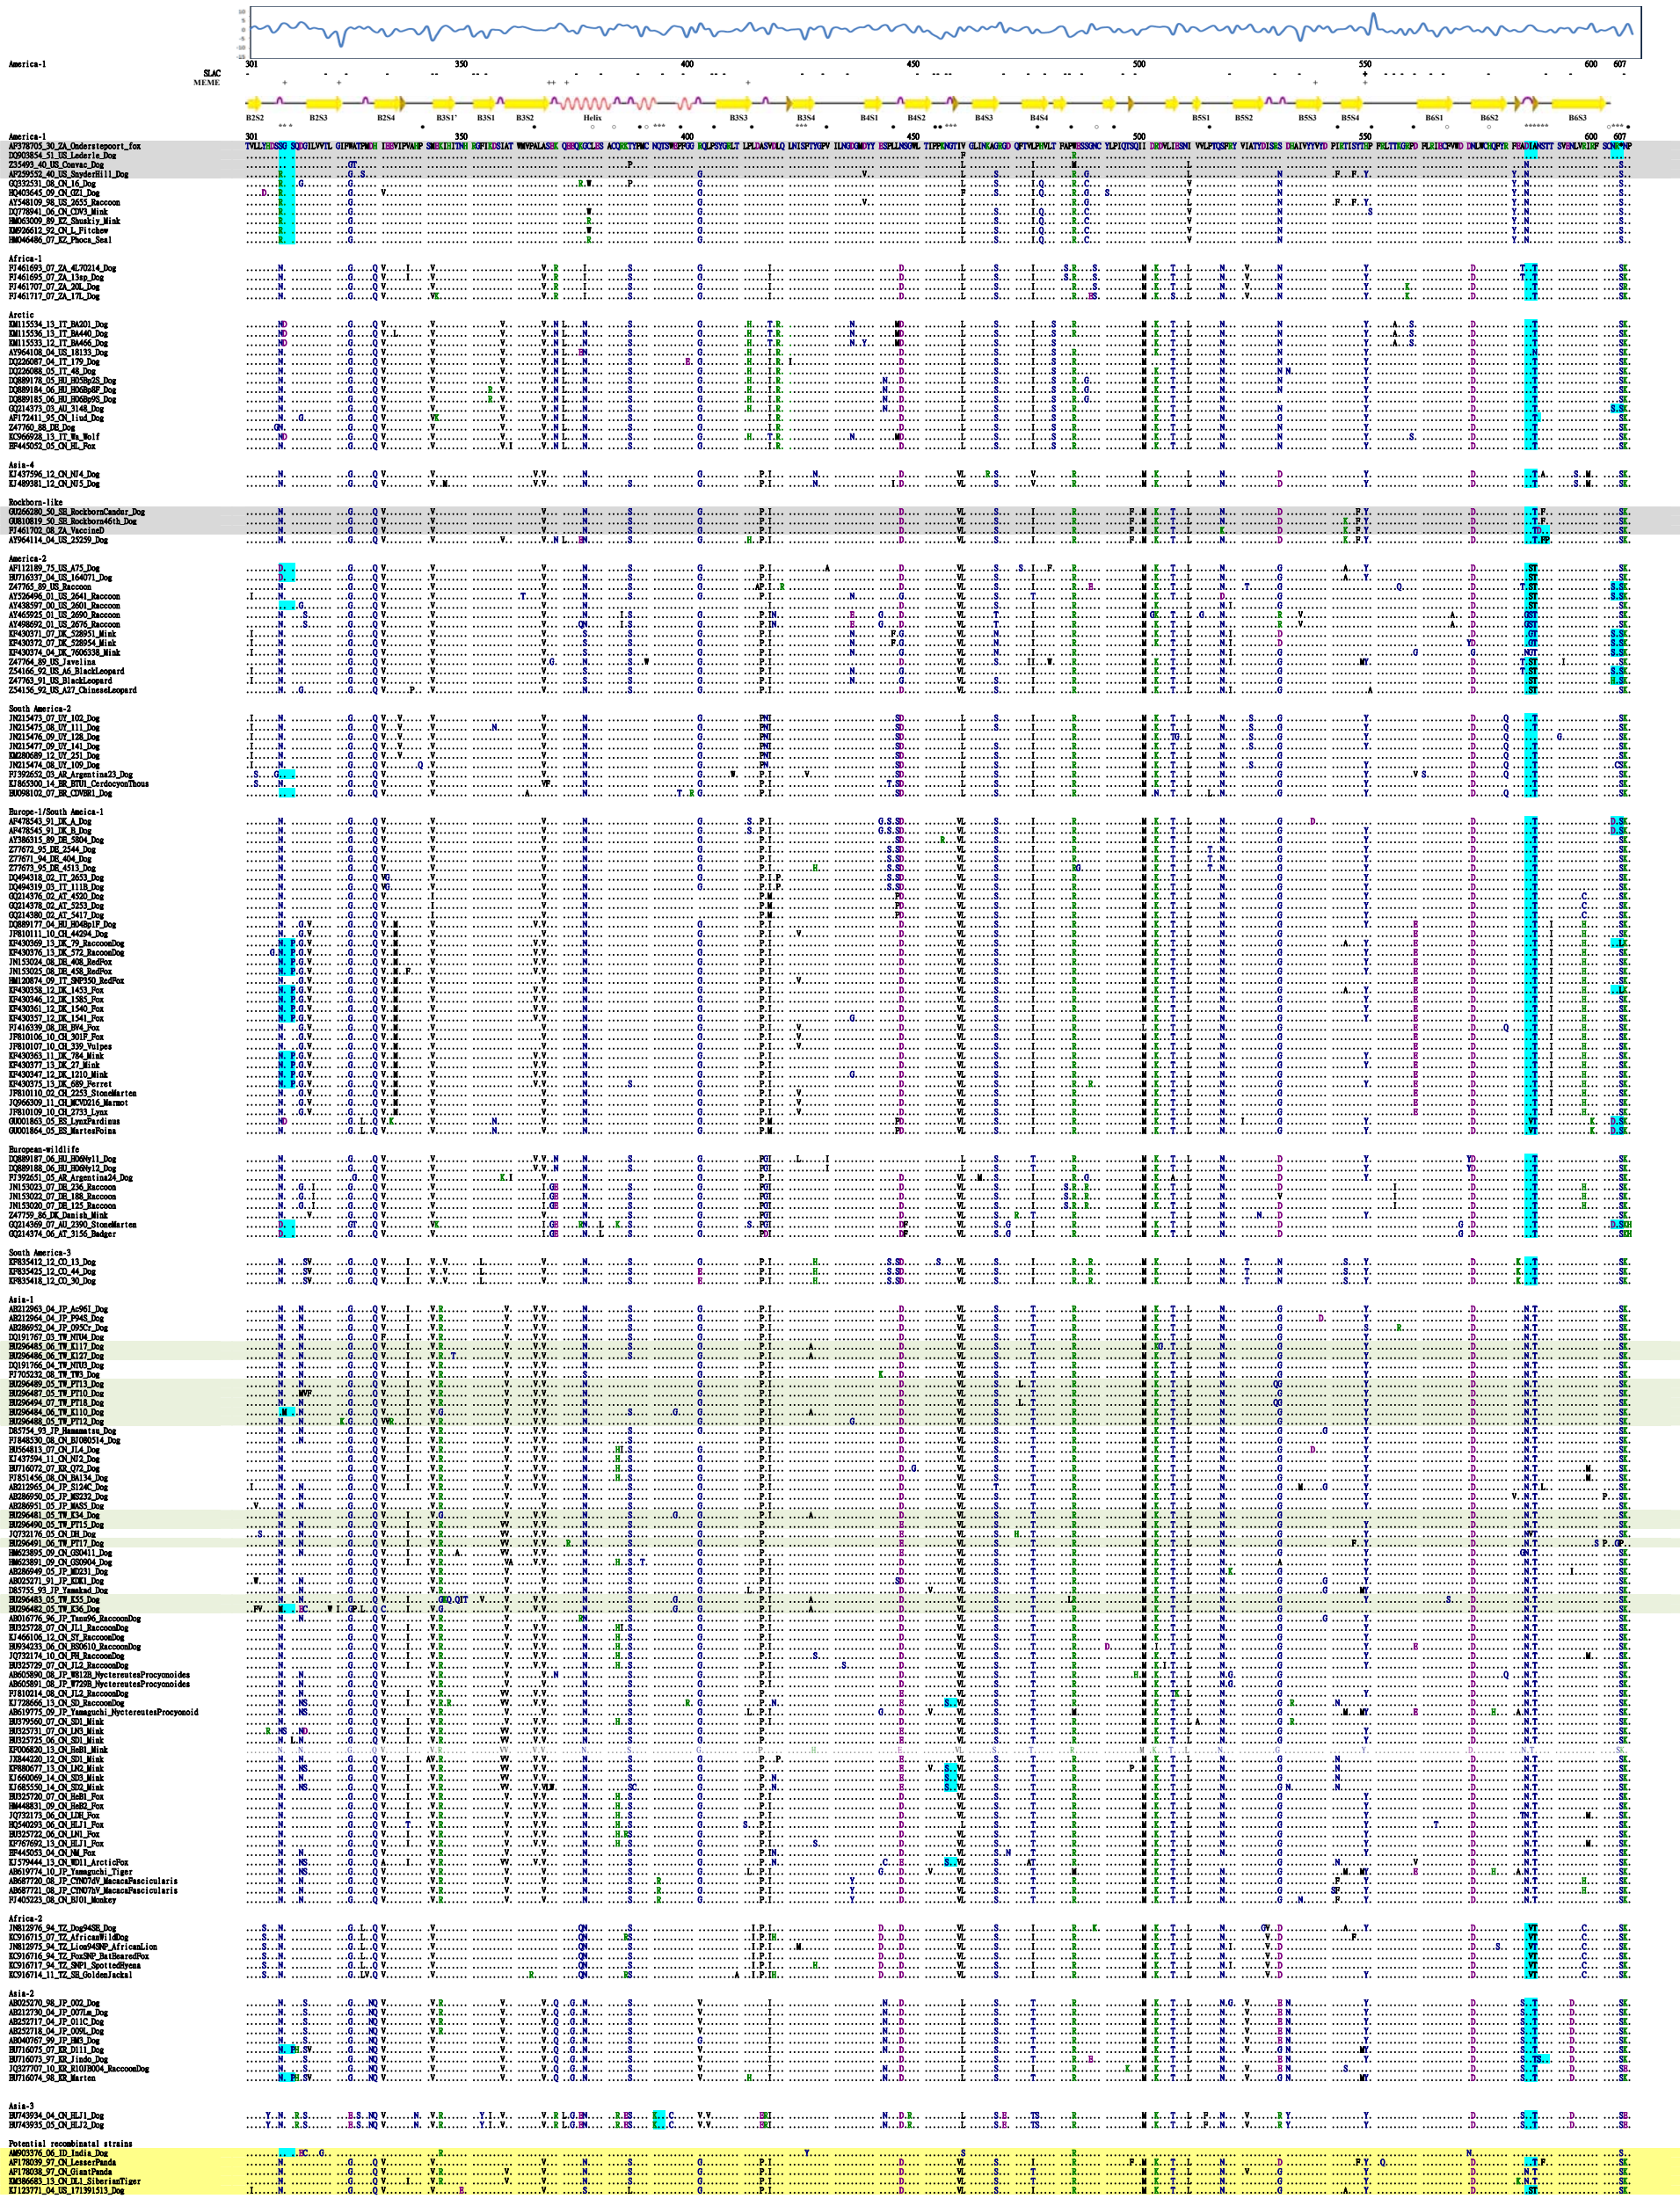

Supplement: 12917_2015_491_MOESM4_ESM.pdf [file 12917_2015_491_MOESM4_ESM.pdf]
